**SHORT COMMUNICATION**

**LOCOMOTION IN LAMPREY AND TROUT: THE RELATIVE  
TIMING OF ACTIVATION AND MOVEMENT**

By THELMA L. WILLIAMS

*Physiology Department, St George's Hospital Medical School,  
London SW17 0RE*

STEN GRILLNER, VLADIMIR V. SMOLJANINOV, PETER WALLÉN,  
SERGEI KASHIN AND SERGE ROSSIGNOL

*Nobel Institute for Neurophysiology, Karolinska Institutet, Stockholm*

*Accepted 4 January 1989*

Most fish swim by the rhythmic passage of a wave of lateral displacement from head to tail, thereby developing a reactive thrust from the water which pushes the fish forward (Marey, 1894). Breder (1926) classified this type of swimming into different modes according to how much of the body performs undulations. In the anguilliform (eel-like) mode most or all of the body is flexible and participates in the passage of the wave, whereas in the carangiform mode the amplitude of the lateral movement becomes significant only as the wave approaches the tail. Anguilliform swimmers tend to have a fairly constant lateral projection along the length of the body, whereas the carangiform swimmers have the more familiar fish shape, with the body tapering to a minimum in the caudal peduncle and then widening again in the caudal fin. The hydrodynamic models appropriate for the theoretical analysis of these two types of swimming reflect these differences in form and function (Lighthill, 1969).

The kinematics of swimming are well documented for several species. Less attention has been given, however, to the role of muscle activation in the production of the observed movements. In the static case, activation of the lateral musculature at a point along the body will develop a local curvature concave to the active side (see Gray, 1933; Alexander, 1969; Wainwright, 1983). During swimming, however, activation does not, in general, coincide with concave curvature, because of the time-dependent interactions of the physical properties of the fish and the water (see Blight, 1977).

It has been shown in the early newt embryo (Blight, 1976) and for escape swimming in the carp (Kashin *et al.* 1979) that a propagated mechanical wave can be produced by muscle activation which simply alternates on the two sides of the body. In this case, energy stored elastically is released as a passively propagated wave that performs work against the water (see Blight, 1976).

Key words: lamprey, locomotion, phase coupling, swimming trout.

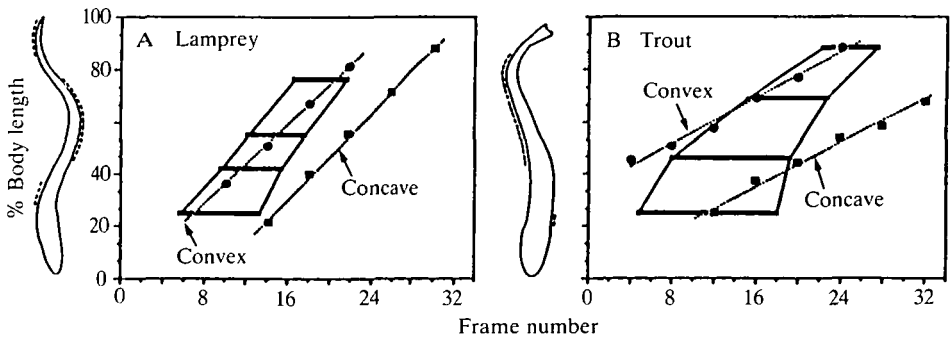

Fig. 1. Passage of the neural (EMG) and mechanical activity during one swimming cycle. Squares indicate maximum concave curvature on the side from which the EMG was recorded, circles maximum convex curvature. Dotted lines show linear regressions through these points. Horizontal bars represent time during which activity occurred at each electrode position along one side of the body only; solid lines connect onset or termination of activity at the four electrode positions. The slope of each line is equal to the respective speed of travel down the body. Body outlines demonstrate activity at frame 16 in the lamprey, frame 19 in the trout. Dashed lines alongside body outline represent active muscle. Water velocity:  $0.70 \text{ m s}^{-1}$ , lamprey,  $0.18 \text{ m s}^{-1}$ , trout; body length:  $0.35 \text{ m}$ , lamprey;  $0.28 \text{ m}$ , trout.

In the usual case, however, a wave of muscle activation does indeed travel from head to tail, as first shown by Grillner (1974), who recorded electromyograms simultaneously at different positions along the body in dogfish. It has also been shown, however, in the eel and dogfish (Grillner & Kashin, 1976) and in the tench (Blight, 1976, 1977) that this wave of activation travels faster than the mechanical wave. The significance of the relative timing of activation and movement is not known (see Blight, 1977). In this paper we describe the quantitative relationship between muscle activation and lateral curvature in two fish which use different swimming styles, the lamprey (an anguilliform) and the trout (a carangiform).

Experiments were performed on three lampreys (*Lampetra fluviatilis*, 28–30 cm) and three rainbow trout (*Salmo gairdneri*, 26–28 cm). The animals were anaesthetized (tricaine methyl sulphate, approx.  $100 \text{ mg l}^{-1}$ ), and fine-wire intramuscular electrodes were placed superficially in the lateral musculature along the midline at four positions along one side of the body. Reflective markers were glued along the dorsal midline (trout only). Synchronized electromyographic and cinematographic recordings were made while an animal swam in a swim-mill against water flowing at constant velocity, over a range of  $0.16$  to  $2.6 \text{ m s}^{-1}$  (Grillner & Kashin, 1976). Filming speed was  $80 \text{ frames s}^{-1}$ , and a digital pulse from the camera was recorded on a separate channel of the EMG record for synchronizing (Grillner *et al.* 1977). Each ciné frame was projected and the positions of the points of maximal concave and convex curvature were estimated. The distance (arc length) along the body of these points from the head (lamprey) or the nearest reflective marker (trout) was determined with a digitizing tablet.

Fig. 1 shows the relative timing of electromyographic and mechanical activity

during approximately one locomotor cycle. It can be seen that in both species the mechanical wave (e.g. maximal concave curvature) travels at nearly constant speed along the body. The wave of activation, as measured by the EMG, also propagates but at a faster speed than the mechanical wave. This is particularly noticeable in the trout: the points of maximal curvature in Fig. 1B are travelling at approximately  $1.7$  body lengths  $s^{-1}$ , whereas the midpoint of the burst of EMG activity is travelling at an average speed of about  $4.0$  lengths  $s^{-1}$ .

When expressed as body lengths per cycle (i.e. wavelength), both the electrical and the mechanical waves travelled independently of the swimming frequency, confirming earlier results in several species (e.g. Bainbridge, 1963; Grillner & Kashin, 1976; Videler & Wardle, 1978; Videler & Hess, 1984). The average wavelength of the mechanical wave was  $0.72 \pm 0.07$  (SD) body lengths in the lamprey and  $0.82 \pm 0.04$  in the trout. The latter value is similar to that found by Webb *et al.* (1984) for trout of the same body length. The speed of propagation of the EMG was nearly constant over the length of the lamprey (see Fig. 1A). Calculated from the travel of the midpoint of the EMG burst, the average wavelength was  $1.05 \pm 0.10$  body lengths. For the trout, however, the speed of EMG propagation changed considerably along the body (see Fig. 1B). Thus the wavelength calculated by passage of the midpoint of the EMG burst between the two most rostral electrodes (at 25% and 45% of the body length) was  $6.0 \pm 1.5$  body lengths, whereas the value between the two most caudal electrodes (at 68% and 86%) was  $1.1 \pm 0.2$  body lengths.

As a consequence of the different speeds of travel of the electrical and mechanical activity, the phase relationship between them changes along the body length. This is illustrated in Fig. 2, which is constructed from average values at several swimming speeds. It gives the average phase lag (expressed as a fraction of the cycle) between electrical activity on one side of the body and the maximal concave curvature towards that side during one wave passage. Thus zero on the y-axis would represent EMG activity occurring at the time of maximal concave curvature towards the active side, whereas  $\pm 0.5$  would represent activity coincident with maximal convex curvature. Values of  $\pm 0.25$  or  $\pm 0.75$  would represent the occurrence of EMG activity when the body is straight.

Near the head of the lamprey, the EMG activity on one side of the animal begins just before maximal curvature convex to the active side (0.50) and ends just before maximal curvature concave to the same side (0.00) (Fig. 2A). About halfway down the body, however, the EMG activity begins approximately as the body is straight (0.75) and continues as convex curvature develops further, ending just before the body is straight once more (0.25).

The timing in the trout is quite different (Fig. 2B). Near the head, the EMG activity begins after the body has begun to develop concave curvature towards the active side, continues as the active side passes through maximum concave curvature, and ends when the body is straight again. Near the tail, the timing approaches that seen in the lamprey, i.e. EMG activity is approximately coincident with convex curvature.

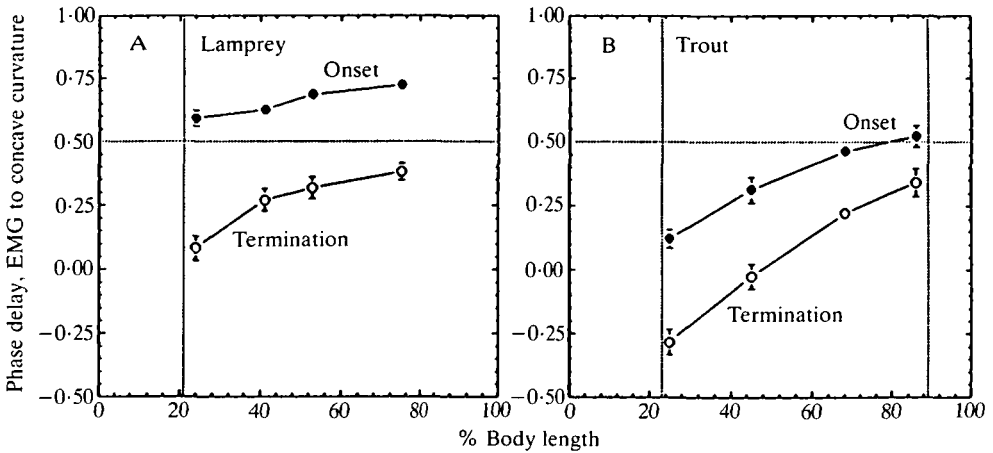

Fig. 2. Phase coupling between muscle activation and movement in lamprey (A) and trout (B). Abscissa, position along the body, measured from the rostral end. Ordinate, phase delay (as fraction of cycle duration) between onset (filled circles) or termination (open circles) of EMG activity and maximal concave curvature towards the side from which recordings were made. Mean values are given for three swimming speeds (error bars are standard errors of the mean): lamprey, 1.6–2.2 body lengths  $s^{-1}$ ; trout, 0.65–9.2 body lengths  $s^{-1}$ . Vertical dotted lines show boundaries with the head and gill region (both lamprey and trout) and the caudal fin (trout only). Horizontal dotted lines represent time of maximal convex curvature of the active side.

Blight (1977) has suggested that muscle activation can contribute to the thrust developed by a passively travelling wave only if the contractile elements add tension along the convex side of the curvature, i.e. a phase coupling of 0.5 as defined in this study. At this time the straight portion of the body one-quarter wavelength caudal to the curvature (the leading edge of the travelling wave) is crossing the line of motion with maximum velocity towards the convex side (see Gray, 1933). Tension along the convex curvature would assist the propulsive force developed here (Blight, 1977). The dotted horizontal lines in Fig. 2A,B represent the timing of such maximum velocity, and it can be seen that for most of the length of the lamprey (but not the trout) this occurs near the midpoint of the EMG burst. Thus, in the lamprey the muscle activation is approximately in phase with the velocity of that portion of the body which is performing work against the water.

In the carangiform, however, the most significant thrust is developed in the tail, and Lighthill (1977) has predicted that the development of force by the body musculature should be in phase with the velocity of the caudal fin. In view of this, we have used the same data as that in Fig. 2 to calculate the phase relationships between the onset and termination of muscle activation at each electrode position and the arrival of the wave of maximal convex curvature at the tip of the caudal fin. These results are presented in Fig. 3 for both lamprey and trout.

Since the maximal lateral velocity of the caudal fin to one side occurs 0.25 cycles later than the maximal curvature concave to that side, values of  $-0.25$  in

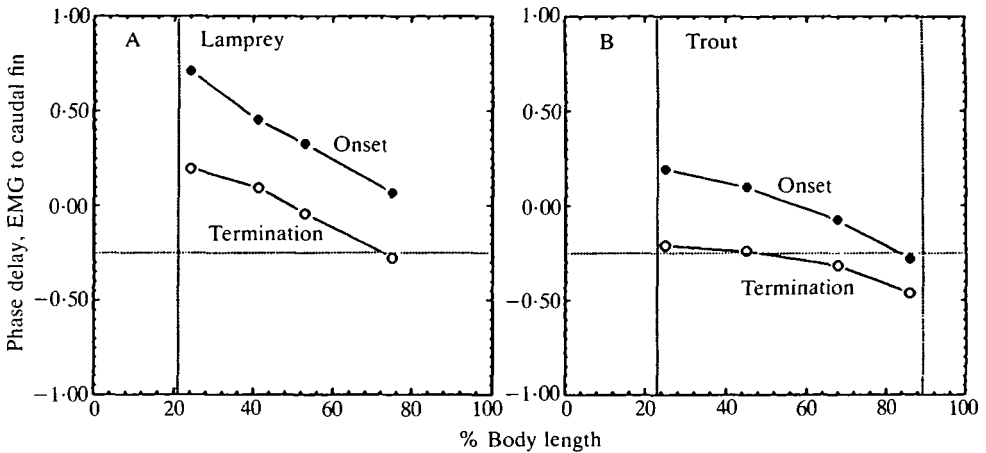

Fig. 3. Phase coupling between muscle activation (EMG) and caudal fin movement. Ordinate, phase delay (as fraction of cycle duration) between EMG activity at each electrode position and arrival of wave of maximal convex curvature at the tip of the caudal fin. Same sequences as in Fig. 2. Horizontal dotted lines represent time of maximal velocity of trailing edge of caudal fin towards side from which EMG was recorded.

Fig. 3A,B would represent coincidence of muscle activity with maximal velocity of the caudal fin towards the active side. In the lamprey (Fig. 3A), only near the tail does the phase approach this value. In the trout, however, almost all the body musculature is activated approximately in phase with the maximum caudal fin velocity (Fig. 3B), as suggested by Lighthill (1977).

The study of how the patterns of neural activity generated by the spinal cord produce swimming can conveniently be divided into two questions. (1) How does activation of the contractile filaments of muscle interact with the physical properties of the body and the water to produce the observed pattern of movements of portions of the body relative to each other? (2) How do such changes in the shape of the body interact with the water to provide forward movement of the entire fish? The latter question falls in the realm of fluid dynamics, and much progress has been made in recent years in the analysis of carangiform swimming (see Webb & Weihs, 1983), even though anguilliform swimming remains intractable (Lighthill, 1983). In this study we have collected data bearing on the first question, for which no relevant models yet exist.

We have examined the relative timing of muscle activation and movement along the length of the body at different swimming speeds in two different types of fish. The timing of muscle activation is, of course, not identical to the timing of force development in the muscle attachments. The delay between the EMG and the onset of tension in the contractile filaments is only a few milliseconds and can be neglected. However, the additional delays introduced by the elastic and inertial properties of the muscle will be at least tens of milliseconds (Wardle, 1975) and will

not decrease in proportion to the cycle length. Hence, at the slower swimming speeds in the trout (2.5 Hz) the additional delay may be of the order of 10% of a cycle, but at the highest frequency (15.8 Hz) it may constitute half a cycle or more. And yet the phase relationship between muscle activation and movement is independent of swimming speed, in both lamprey and trout. This is a finding which has no obvious explanation but which must be taken into account in any mechanical model relating muscle force development to body movements. Our results do not bear directly on hydrodynamic theories of swimming, but the observation that the activation of the contractile filaments is approximately in phase with the velocity of that part of the body which is doing the most work against the water (Fig. 3A, lamprey; Fig. 3B, trout) may reflect a functional similarity in the two species.

If the activation along the entire length of the trout were exactly in phase with the velocity of the caudal fin, the muscle activation would occur as a standing wave, alternating left and right. Theoretical calculations from kinematic data for saithe and mackerel (Hess & Videler, 1984) led these authors to conclude that muscle force occurs as a standing wave. In contrast, the experimental data reported here clearly show that the activation of the contractile elements occurs as a travelling wave. However, the large burst duration in the rostral part of the trout, coupled with the high velocity of propagation of the EMG wave (Fig. 1B), produces some of the features of a standing wave, in that most of the musculature is active at the time of maximal caudal fin velocity (dotted line in Fig. 3B).

In the lamprey (Grillner *et al.* 1981) and the dogfish (Grillner & Wallén, 1982) studies with paralysed or *in vitro* preparations have demonstrated a powerful system of movement-generated sensory feedback which ensures the appropriate timing between activation and movement (see Wallén & Williams, 1985; Williams, 1986; Sigvardt, 1989). It is not known whether such a system also exists in the teleosts but it would seem likely that it does, especially in view of the very tight coupling demonstrated here in the trout. In the lamprey such feedback is mediated, at least in part, by intraspinal mechanoreceptors (Grillner *et al.* 1982, 1984). It is therefore not possible by deafferentation to discover what the relative timing between activation and movement would be without such feedback. It would seem unlikely that the sensory feedback would be required to oppose the mechanical system except for correcting errors. We could thus assume that in steady constant swimming the mechanical system of the body of the fish and the water are well matched to the neurally generated pattern so as to provide approximately the appropriate timing without the need for sensory feedback. The differences in such relative timing in these two species reflect the different swimming strategies that have evolved.

We are very grateful to Karen Sigvardt and Nancy Kopell for many helpful comments on the manuscript. This work was supported by the Swedish MRC (3026) and by the SERC (UK).

## References

- ALEXANDER, R. McN. (1969). Orientation of muscle fibres in the myomeres of fishes. *J. mar. Biol. Ass. U.K.* **49**, 263–290.
- BAINBRIDGE, R. (1963). Caudal fin and body movements in the propulsion of some fish. *J. exp. Biol.* **40**, 23–56.
- BLIGHT, A. (1976). Undulatory swimming with and without waves of contraction. *Nature, Lond.* **264**, 352–354.
- BLIGHT, A. (1977). The muscular control of vertebrate swimming movements. *Biol. Rev.* **52**, 181–218.
- BREDER, C. A. (1926). The locomotion of fishes. *Zoologica (New York)* **4**, 159–297.
- GRAY, J. (1933). Studies in animal locomotion. I. The movement of fish with special reference to the eel. *J. exp. Biol.* **10**, 88–104.
- GRILLNER, S. (1974). On the generation of locomotion in the spinal dogfish. *Expl Brain Res.* **20**, 459–470.
- GRILLNER, S. & KASHIN, S. (1976). On the generation and performance of swimming in fish. In *Neural Control of Locomotion* (ed. R. Herman, S. Grillner, P. Stein & D. Stuart), pp. 181–202. New York: Plenum Press.
- GRILLNER, S., MCCLELLAN, A. & PERRET, C. (1981). Entrainment of the spinal pattern generators for swimming by mechanosensitive elements in the lamprey spinal cord *in vitro*. *Brain Res.* **217**, 380–386.
- GRILLNER, S., MCCLELLAN, A. D. & SIGVARDT, K. A. (1982). Mechanosensitive neurones in the spinal cord of the lamprey. *Brain Res.* **235**, 169–173.
- GRILLNER, S., ROSSIGNOL, S. & WALLÉN, P. (1977). The adaptation of a reflex response to the ongoing phase of locomotion in fish. *Expl Brain Res.* **30**, 1–11.
- GRILLNER, S. & WALLÉN, P. (1982). On peripheral control mechanisms acting on the central pattern generators for swimming in the dogfish. *J. exp. Biol.* **98**, 1–22.
- GRILLNER, S., WILLIAMS, T. & LAGERBÄCK, P. Å. (1984). The edge cell, a possible intraspinal mechanoreceptor. *Science* **223**, 500–503.
- HESS, F. & VIDELER, J. J. (1984). Fast continuous swimming of two pelagic predators, saithe (*Pollachius virens*) and mackerel (*Scomber scombrus*): a dynamic analysis of bending moments and muscle power. *J. exp. Biol.* **109**, 229–251.
- KASHIN, S., FELDMAN, A. G. & ORLOVSKY, G. N. (1979). Different modes of swimming in the carp, *Cyprinus carpio* L. *J. Fish Biol.* **14**, 403–405.
- LIGHTHILL, M. J. (1969). Hydrodynamics of aquatic animal propulsion. *A. Rev. Fluid Mech.* **1**, 413–446.
- LIGHTHILL, M. J. (1977). Mathematical theories of fish swimming. In *Fisheries Mathematics* (ed. J. H. Steele), pp. 131–144. New York: Academic Press.
- LIGHTHILL, M. J. (1983). Epilogue: toward a more fully integrated fish biomechanics. In *Fish Biomechanics* (ed. P. W. Webb & D. Weihs), pp. 372–375. New York: Praeger.
- MAREY, E. J. (1894). *Le Mouvement*. Paris: Masson.
- SIGVARDT, K. A. (1989). Spinal mechanisms in the control of lamprey swimming. In *Axial Movement Systems: Biomechanics and Neural Control* (ed. E. J. Peterson), *Am. Zool.* **29** (in Press).
- VIDELER, J. J. & HESS, F. (1984). Fast continuous swimming of two pelagic predators, saithe (*Pollachius virens*) and mackerel (*Scomber scombrus*): a kinematic analysis. *J. exp. Biol.* **109**, 209–228.
- VIDELER, J. J. & WARDLE, C. S. (1978). New kinematic data from high speed cine film recordings of swimming cod (*Gadus morhua*). *Neth. J. Zool.* **28**, 465–484.
- WAINWRIGHT, S. A. (1983). To bend a fish. In *Fish Biomechanics* (ed. P. W. Webb & D. Weihs), pp. 68–91. New York: Praeger.
- WALLÉN, P. & WILLIAMS, T. L. (1985). The role of movement-related feedback in the control of locomotion in fish and lamprey. In *Feedback and Motor Control in Invertebrates and Vertebrates* (ed. W. J. P. Barnes & M. H. Gladden), pp. 317–335. London: Croom Helm.
- WARDLE, C. S. (1975). Limit of fish swimming speed. *Nature, Lond.* **255**, 725–727.
- WEBB, P. W., KOSTECKI, P. T. & STEVENS, E. D. (1984). The effect of size and swimming speed on locomotor kinematics of rainbow trout. *J. exp. Biol.* **109**, 77–95.

WEBB, P. W. & WEIHS, D. (1983). *Fish Biomechanics*. New York: Praeger.

WILLIAMS, T. L. (1986). Mechanical and neural patterns underlying swimming by lateral undulations: a review of studies on fish, amphibia and lamprey. In *Neurobiology of Vertebrate Locomotion* (ed. P. S. G. Stein, D. G. Stuart, H. Forsberg & R. Herman), pp. 141–155. London: Macmillan.



## Information about the journal

All communications should be addressed to the Editor,  
The Journal of Experimental Biology, Department of Zoology,  
Downing Street, Cambridge CB2 3EJ, England.

### Experiments on living animals

The Editorial Board will not allow the publication of papers describing experimental procedures which may reasonably be presumed to have inflicted unnecessary pain, discomfort, or disturbance of normal health on living animals. Manuscripts will only be accepted if:

- 1 it is clear that the advances made in physiological knowledge justified the procedures;
- 2 appropriate anaesthetic and surgical procedures were followed;
- 3 adequate steps were taken to ensure that animals did not suffer unnecessarily at any stage of the experiment.

Papers on vertebrates will be accepted only if the experiments comply with the legal requirements in the UK (see *Handbook for the Animal Licence Holder* – Institute of Biology; *Notes on the Law Relating to Experiments on Animals in Great Britain* – Research Defence Society; *UFAW Handbook on the Care and Management of Laboratory Animals*) or Federal Legislation and the National Institutes of Health Guidelines in the USA. Department of Health Education and Welfare Publication No. NIH 78-23 (1978).

### Subscriptions

*The Journal of Experimental Biology* (ISSN 0022-0949) is published as seven volumes a year in January, March, May, July, September, October and November. The subscription price of volumes 141–147 (1989) is £310.00 UK (USA and Canada US \$685.00, Japan £400.00, rest of the world £355.00) per annum, payable in advance; postage is included. There are reduced subscriptions for individual use (£58, \$80) and for members of certain societies (£40, \$75). Orders for 1989, which can be in £ Sterling/Dollars or Access/Visa credit cards, should be sent to The Biochemical Society Book Depot, PO Box 32, Commerce Way, Colchester CO2 8HP, UK or to your normal agent or bookseller. Copies of the journal for subscribers in the USA and Canada are sent by air to New Jersey to arrive with minimum delay. Second class postage paid at Rahway, NJ, and at additional mailing offices.

Postmaster, send address corrections to: The Journal of Experimental Biology, c/o Mercury Airfreight International Inc., 2323 Randolph Avenue, Avenel, New Jersey 07001, USA (US Mailing Agent).

Claims for missing parts can only be considered if made immediately upon receipt of the subsequent issue.

**Back volumes.** Please contact The Biochemical Society Book Depot (see above) for prices.

**Index.** An annual index will appear in the last volume each year.

### Copyright and reproduction

Authors may make copies of their own papers in this journal without seeking permission from The Company of Biologists Limited, *provided that such copies are for free distribution only: they must not be sold.*

Authors may re-use their own illustrations in other publications appearing under their own name, without seeking permission.

Specific permission will *not* be required for photocopying copyright material in the following circumstances.

- 1 For private study, provided the copying is done by the person requiring its use, or by an employee of the institution to which he/she belongs, without charge beyond the actual cost of copying.
- 2 For the production of multiple copies of such material, to be used for *bona fide* educational purposes, provided this is done by a member of the staff of the university, school or other comparable institution, for distribution without profit to student members of that institution provided the copy is made from the original journal.

For all other matters relating to the reproduction of copyright material written application must be made to Dr R. J. Skaer, Company Secretary, The Company of Biologists Limited, Department of Zoology, Downing Street, Cambridge CB2 3EJ, UK.

ISI Tear Service, 3501 Market Street, Philadelphia, Pennsylvania 19104, USA is authorized to supply single copies of separate articles for private use only.
